# Supplementary material for: Drought Impact on the Morpho-Physiological Parameters of Perennial Rhizomatous Grasses in the Mediterranean Environment
Source: MDPI journal article supplement (doi:10.3390/agriculture13061233), 2023-06-12
Supplement: s1 [file s1]

## Supplementary Material

**Table S1.** Maximum photosynthetic carboxylation rate ( $V_c \max$   $\mu\text{mol CO}_2 \text{ m}^{-2} \text{ s}^{-1}$ ), maximum rate of electron transport ( $J_{\max}$   $\mu\text{mol e}^- \text{ m}^{-2} \text{ s}^{-1}$ ) and intrinsic water use efficiency ( $\text{WUE}_i$ ,  $\mu\text{mol mol}^{-1}$ ) in *Panicum virgatum* L., *Miscanthus x giganteus* and *Arundo donax* L. plants grown under irrigated (WA) and non-water (NW) conditions during the first (1<sup>st</sup>) and second (2<sup>nd</sup>) year at T0 (May), T1 (June) and T2 (August). *Miscanthus* plants presented foliar senescence under T2 and NW conditions; thus, these parameters could not be measured during either year of evaluation. Values represent the mean  $\pm$  SE of nine replicates (n=9). Different capital letters indicate significant differences ( $p < 0.05$ ) between years for the same specie, time and treatment. Different lowercase letters indicate significant differences ( $p < 0.05$ ) between treatment for the same specie, time and year.

| Parameter      | Time | Treatment | <i>Panicum virgatum</i> L. |                |                      |                | <i>Miscanthus x giganteus</i> |                |                      |                | <i>Arundo donax</i> L. |                |                      |                |
|----------------|------|-----------|----------------------------|----------------|----------------------|----------------|-------------------------------|----------------|----------------------|----------------|------------------------|----------------|----------------------|----------------|
|                |      |           | 1 <sup>st</sup> year       |                | 2 <sup>nd</sup> year |                | 1 <sup>st</sup> year          |                | 2 <sup>nd</sup> year |                | 1 <sup>st</sup> year   |                | 2 <sup>nd</sup> year |                |
| $V_{c\max}$    | T0   | WA        | 53.41                      | $\pm 5.09$ Aa  | 55.39                | $\pm 6.74$ Aa  | 45.09                         | $\pm 5.45$ Ba  | 60.77                | $\pm 9.82$ Ab  | 107.45                 | $\pm 10.75$ Aa | 117.56               | $\pm 10.24$ Aa |
|                | T0   | NW        | 53.41                      | $\pm 5.09$ Aa  | 55.39                | $\pm 6.74$ Aa  | 45.09                         | $\pm 5.45$ Ba  | 60.77                | $\pm 9.82$ Ab  | 107.45                 | $\pm 10.75$ Aa | 117.56               | $\pm 10.24$ Aa |
|                | T1   | WA        | 53.38                      | $\pm 8.84$ Ba  | 78.66                | $\pm 15.28$ Ab | 57.39                         | $\pm 2.56$ Bb  | 71.89                | $\pm 3.10$ Cc  | 103.95                 | $\pm 14.08$ Aa | 107.97               | $\pm 6.76$ Aa  |
|                | T1   | NW        | 24.08                      | $\pm 4.41$ Cb  | 20.16                | $\pm 5.16$ Cc  | 9.29                          | $\pm 1.70$ Ec  | 21.79                | $\pm 9.47$ Dd  | 100.24                 | $\pm 12.10$ Aa | 95.44                | $\pm 8.72$ Aa  |
|                | T2   | WA        | 57.96                      | $\pm 10.27$ Dd | 60.26                | $\pm 4.60$ Dd  | 41.31                         | $\pm 12.16$ Aa | 83.67                | $\pm 3.14$ Fe  | 112.78                 | $\pm 29.90$ Aa | 91.84                | $\pm 22.77$ Ab |
|                | T2   | NW        | 6.51                       | $\pm 3.66$ Ee  | 9.48                 | $\pm 3.73$ Ce  | sd                            |                | sd                   |                | 51.37                  | $\pm 12.62$ Bb | 55.01                | $\pm 11.90$ Bc |
| $J_{\max}$     | T0   | WA        | 90.80                      | $\pm 11.26$ Aa | 146.38               | $\pm 13.48$ Bb | 73.38                         | $\pm 9.70$ Aa  | 127.50               | $\pm 7.08$ Ba  | 208.13                 | $\pm 6.68$ Ba  | 278.13               | $\pm 65.44$ Ab |
|                | T0   | NW        | 90.80                      | $\pm 11.26$ Aa | 146.38               | $\pm 13.48$ Bb | 73.38                         | $\pm 9.70$ Aa  | 127.50               | $\pm 7.08$ Ba  | 208.13                 | $\pm 6.68$ Ba  | 278.13               | $\pm 65.44$ Ab |
|                | T1   | WA        | 120.52                     | $\pm 20.96$ Cb | 150.80               | $\pm 22.28$ Cc | 93.00                         | $\pm 4.4$ Cb   | 102.46               | $\pm 3.26$ Db  | 137.93                 | $\pm 16.28$ Dd | 233.17               | $\pm 11.92$ Cd |
|                | T1   | NW        | 30.15                      | $\pm 3.99$ Dc  | 32.75                | $\pm 9.51$ Dd  | 26.49                         | $\pm 5.03$ Ec  | 31.58                | $\pm 7.38$ Ec  | 123.44                 | $\pm 15.36$ Ed | 156.71               | $\pm 22.53$ Ec |
|                | T2   | WA        | 92.32                      | $\pm 15.20$ Aa | 127.27               | $\pm 11.44$ Be | 68.45                         | $\pm 3.54$ Aa  | 66.72                | $\pm 8.06$ Fd  | 185.88                 | $\pm 37.07$ Eb | 168.63               | $\pm 9.78$ Ee  |
|                | T2   | NW        | 19.84                      | $\pm 6.11$ Ee  | 31.72                | $\pm 4.08$ Df  | sd                            |                | sd                   |                | 115.81                 | $\pm 15.36$ Gc | 85.86                | $\pm 14.51$ Fe |
| $\text{WUE}_i$ | T0   | WA        | 148.69                     | $\pm 16.34$ Aa | 141.67               | $\pm 17.47$ Aa | 142.50                        | $\pm 16.69$ Aa | 137.04               | $\pm 11.62$ Aa | 78.13                  | $\pm 8.83$ Aa  | 65.28                | $\pm 2.19$ Aa  |
|                | T0   | NW        | 148.69                     | $\pm 16.34$ Aa | 141.67               | $\pm 17.47$ Aa | 142.50                        | $\pm 16.69$ Aa | 137.04               | $\pm 11.62$ Aa | 78.13                  | $\pm 8.83$ Aa  | 65.28                | $\pm 2.19$ Aa  |
|                | T1   | WA        | 175.00                     | $\pm 3.54$ Bb  | 94.43                | $\pm 30.34$ Bb | 134.75                        | $\pm 22.00$ Aa | 166.63               | $\pm 18.91$ Bb | 66.68                  | $\pm 24.76$ Aa | 83.96                | $\pm 10.65$ Bb |
|                | T1   | NW        | 321.43                     | $\pm 14.23$ Dd | 169.00               | $\pm 12.17$ Cc | 125.00                        | $\pm 27.42$ Aa | 200.00               | $\pm 22.52$ Cc | 134.82                 | $\pm 25.76$ Bb | 143.76               | $\pm 8.65$ Dc  |
|                | T2   | WA        | 172.22                     | $\pm 14.23$ Bb | 134.75               | $\pm 33.17$ Cd | 163.83                        | $\pm 30.93$ Bb | 134.38               | $\pm 23.32$ Aa | 75.00                  | $\pm 11.30$ Aa | 55.30                | $\pm 7.31$ Cd  |
|                | T2   | NW        | 198.13                     | $\pm 18.05$ Cc | 177.67               | $\pm 26.09$ De | nd                            |                | nd                   |                | 71.40                  | $\pm 8.94$ Aa  | 125.98               | $\pm 27.35$ De |

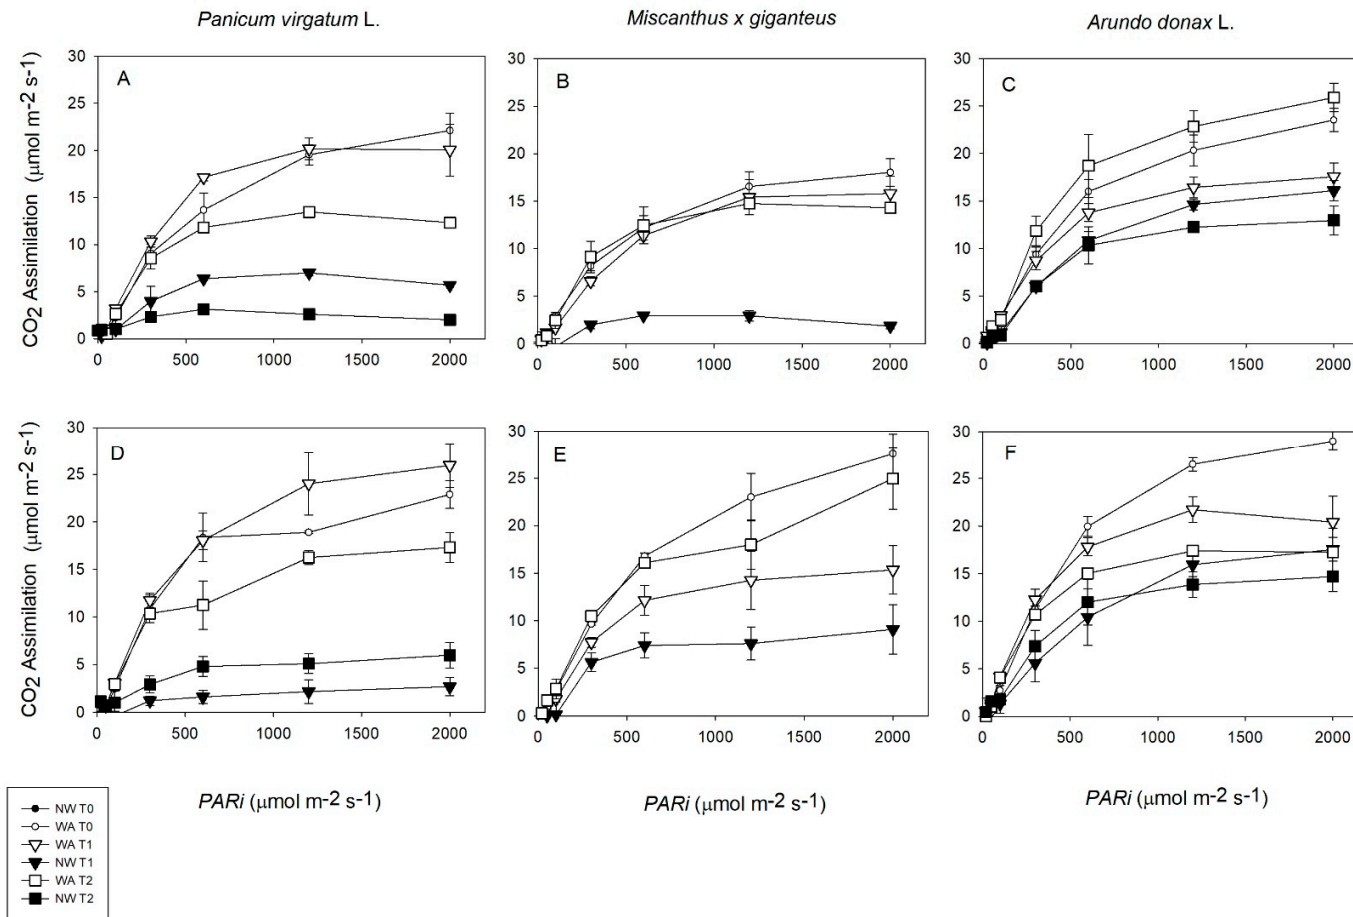

**Figure S1.** Photosynthetic light response curves (A/PARi) in *Panicum virgatum* L., *Miscanthus x giganteus* and *Arundo donax* L. plants grown under irrigated (WA) and non-water (NW) conditions, during the 1<sup>st</sup> (A, B, C) and 2<sup>nd</sup> year (D, E, F), at different times (T0: May, T1: June and T2: August). *Miscanthus* plants presented foliar senescence under T2 and NW conditions; thus, this parameter could not be measured during both years of evaluation. Values represent the mean  $\pm$  SD of nine replicates (n=9).

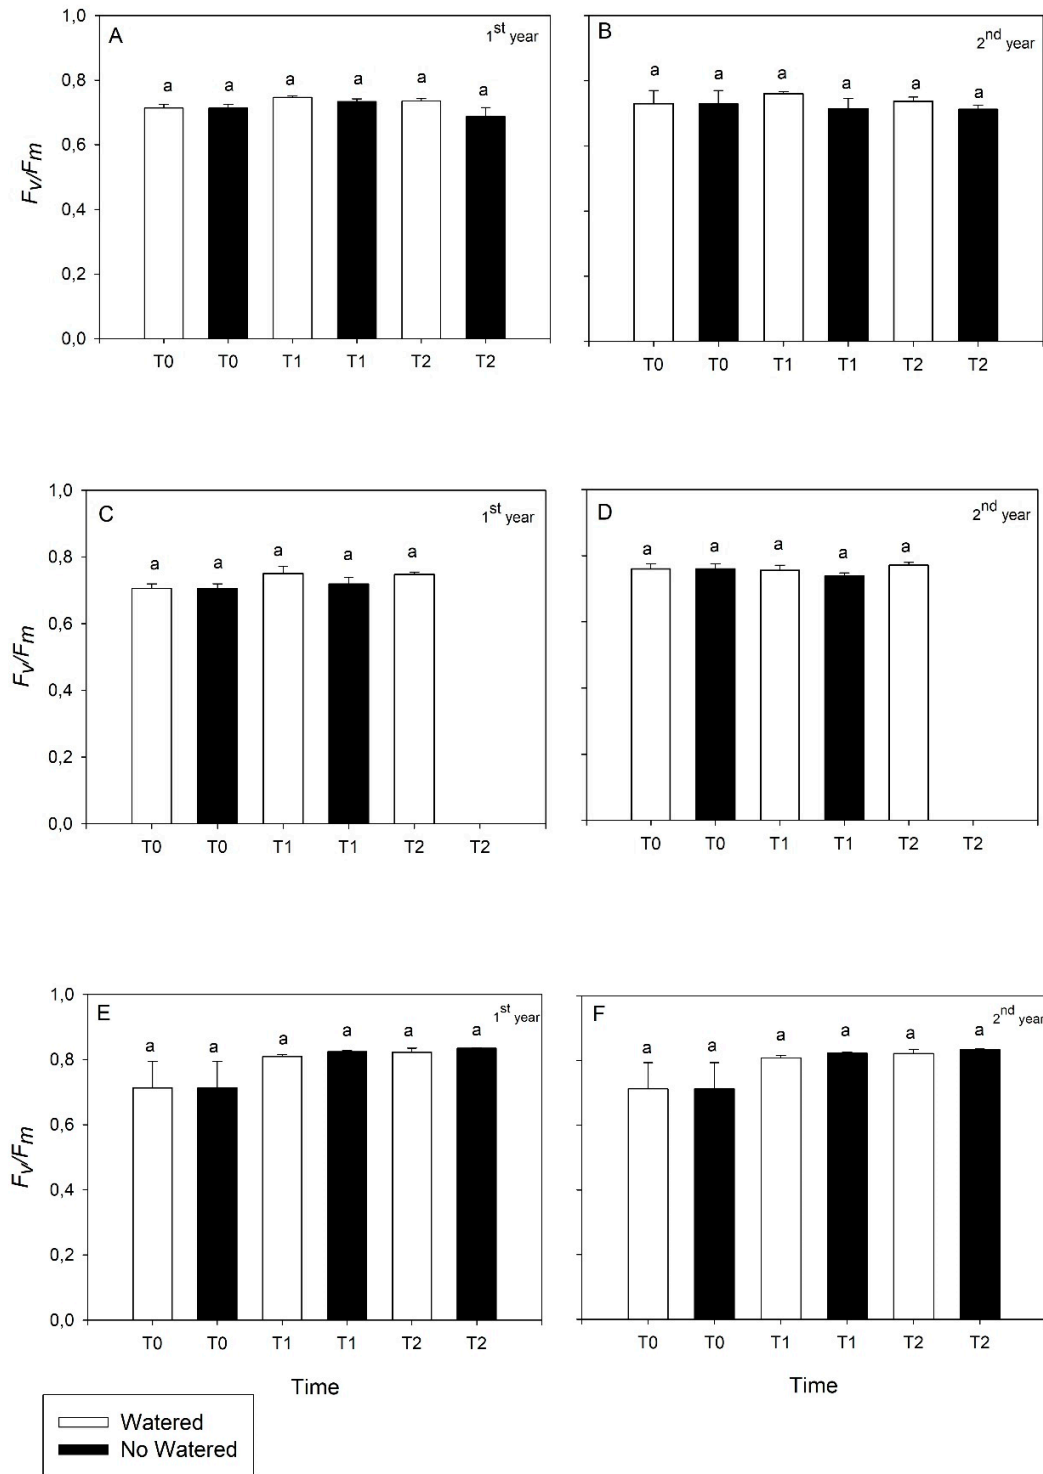

**Figure S2.** Maximum quantum yield of photosystem II ( $F_v/F_m$ ) in *Panicum virgatum* L. (A, B), *Miscanthus x giganteus* (C, D) and *Arundo donax* L. (E, F) plants grown under irrigated (WA) and non-water (NW) conditions during the 1<sup>st</sup> and 2<sup>nd</sup> year, at different times (T0: May, T1: June and T2: August). *Miscanthus* plants presented foliar senescence under T2 and NW conditions; thus, this parameter could not be measured during either year of evaluation. Values represent the mean  $\pm$  SD of nine replicates (n=9). Different lowercase letters indicate significant differences ( $p < 0.05$ ) between treatment for the same time.

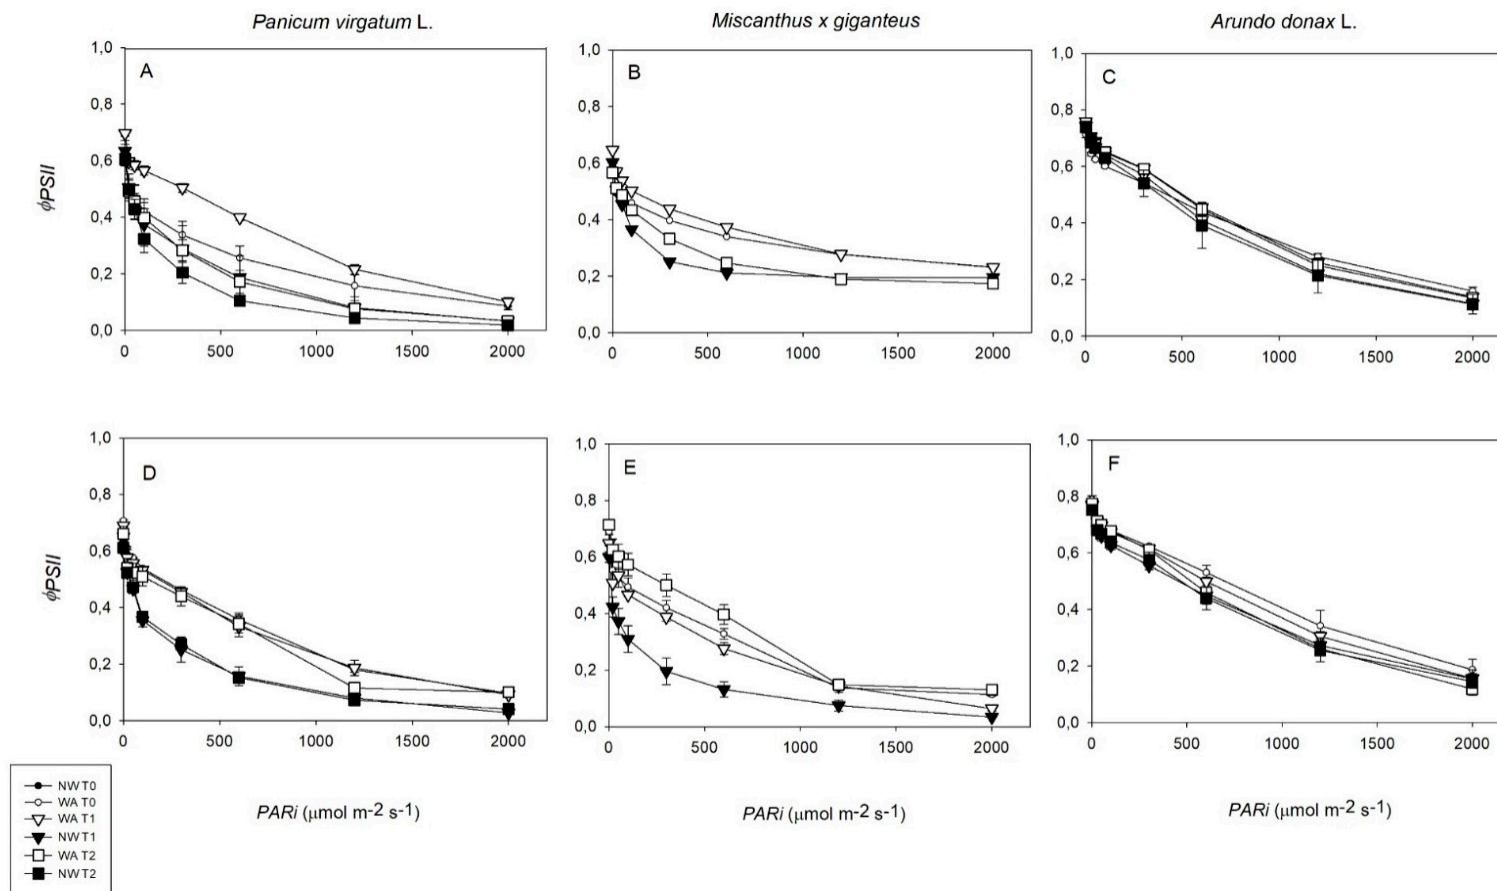

**Figure S3.** Relative quantum efficiency of photosystem II electron transport ( $\Phi_{PSII}$ ) in *Panicum virgatum* L., *Miscanthus x giganteus* and *Arundo donax* L. plants grown under irrigated (WA) and non-watered (NW) conditions, during the 1<sup>st</sup> (A, B, C) and 2<sup>nd</sup> year (D, E, F), at different times (T0: May, T1: June and T2: August). *Miscanthus* plants presented foliar senescence under T2 and NW conditions; thus, this parameter could not be measured during both years of evaluation. Values represent the mean  $\pm$  SD of nine replicates (n=9).

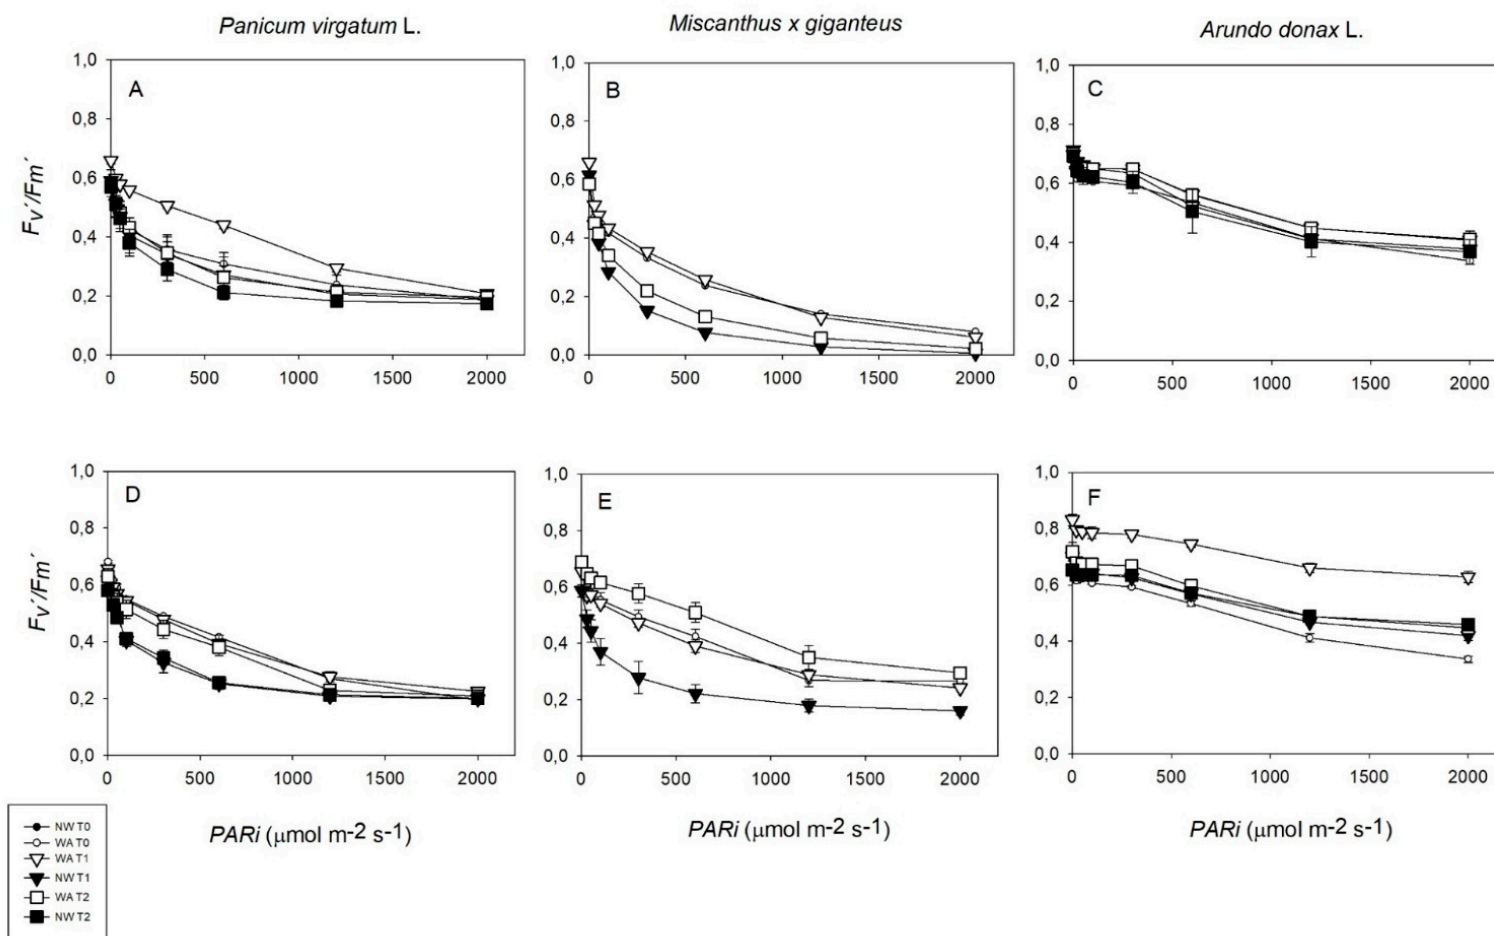

**Figure S4.** Efficiency of excitation energy captured by the open reaction centers of photosystem II ( $F_v'/F_m'$ ) in *Panicum virgatum* L., *Miscanthus x giganteus* and *Arundo donax* L. plants grown under irrigated (WA) and non-watered (NW) conditions, during the 1<sup>st</sup> (A, B, C) and 2<sup>nd</sup> year (D, E, F), at different times (T0: May, T1: June and T2: August). *Miscanthus* plants presented foliar senescence under T2 and NW conditions; thus, this parameter could not be measured during both years of evaluation. Values represent the mean  $\pm$  SD of nine replicates (n=9).

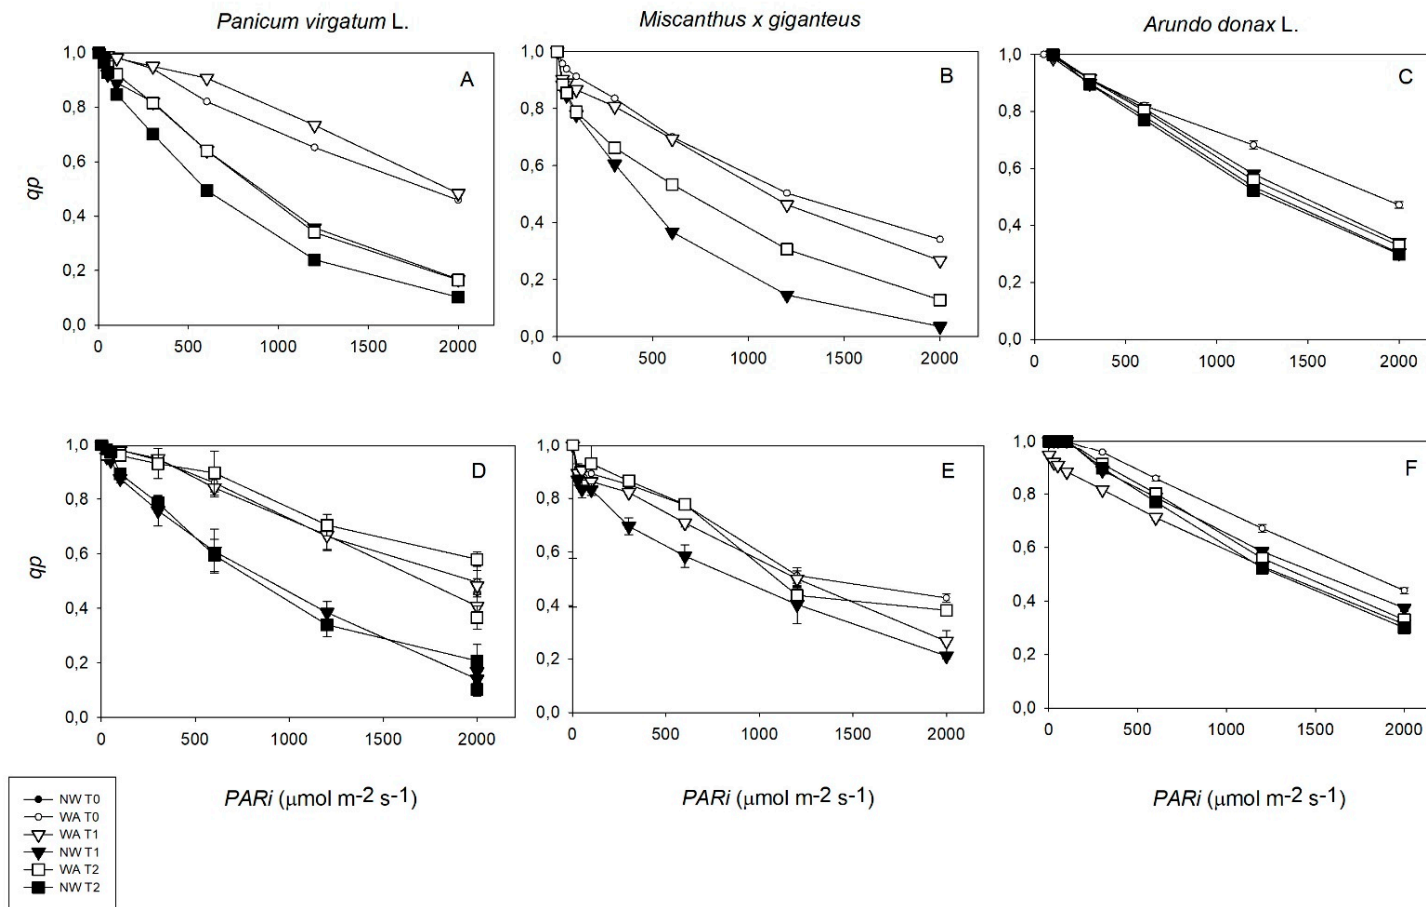

**Figure S5.** Photochemical quenching ( $qp$ ) in *Panicum virgatum* L., *Miscanthus x giganteus* and *Arundo donax* L. plants grown under irrigated (WA) and non-watered (NW) conditions, during the 1<sup>st</sup> (A, B, C) and 2<sup>nd</sup> year (D, E, F) at different times (T0: May, T1: June and T2: August). *Miscanthus* plants presented foliar senescence under T2 and NW conditions; thus, this parameter could not be measured during both years of evaluation. Values represent the mean  $\pm$  SD of nine replicates ( $n=9$ ).

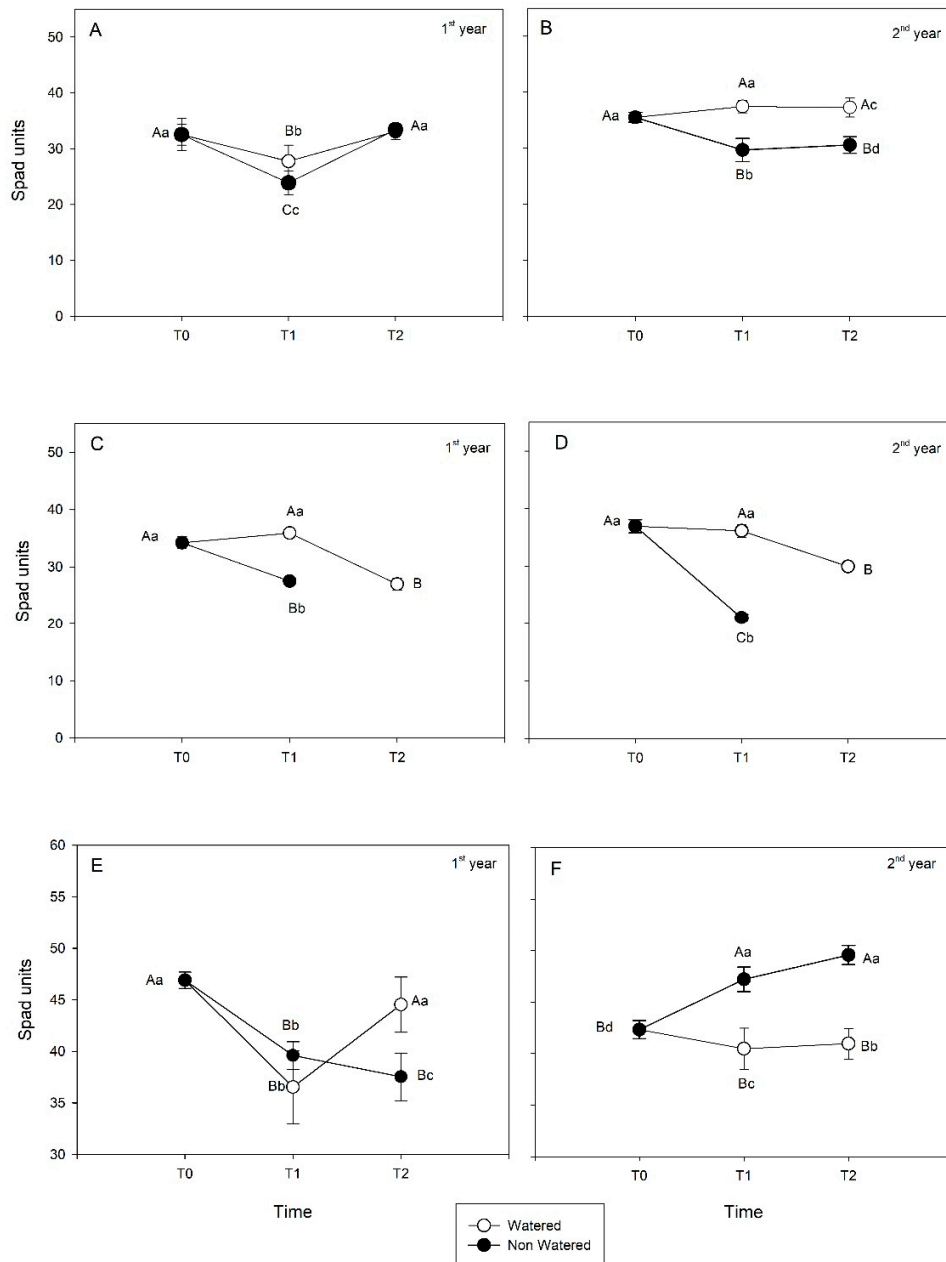

**Figure S6.** Leaf greenness (SPAD units) in leaves of *Panicum virgatum* L. (A, B), *Miscanthus x giganteus* (C, D) and *Arundo donax* L. (E, F) grown under irrigated (WA) and non-water (NW) conditions, during the 1<sup>st</sup> and 2<sup>nd</sup> year at different times (T0: May, T1: June and T2: August). *Miscanthus* plants presented foliar senescence under T2 and NW conditions; thus, this parameter could not be measured during both years of evaluation. Values represent the mean  $\pm$  SD of nine replicates (n=9). Different capital letters indicate significant differences ( $p < 0.05$ ) between time for the same treatment. Different lowercase letters indicate significant differences ( $p < 0.05$ ) between treatment for the same time.

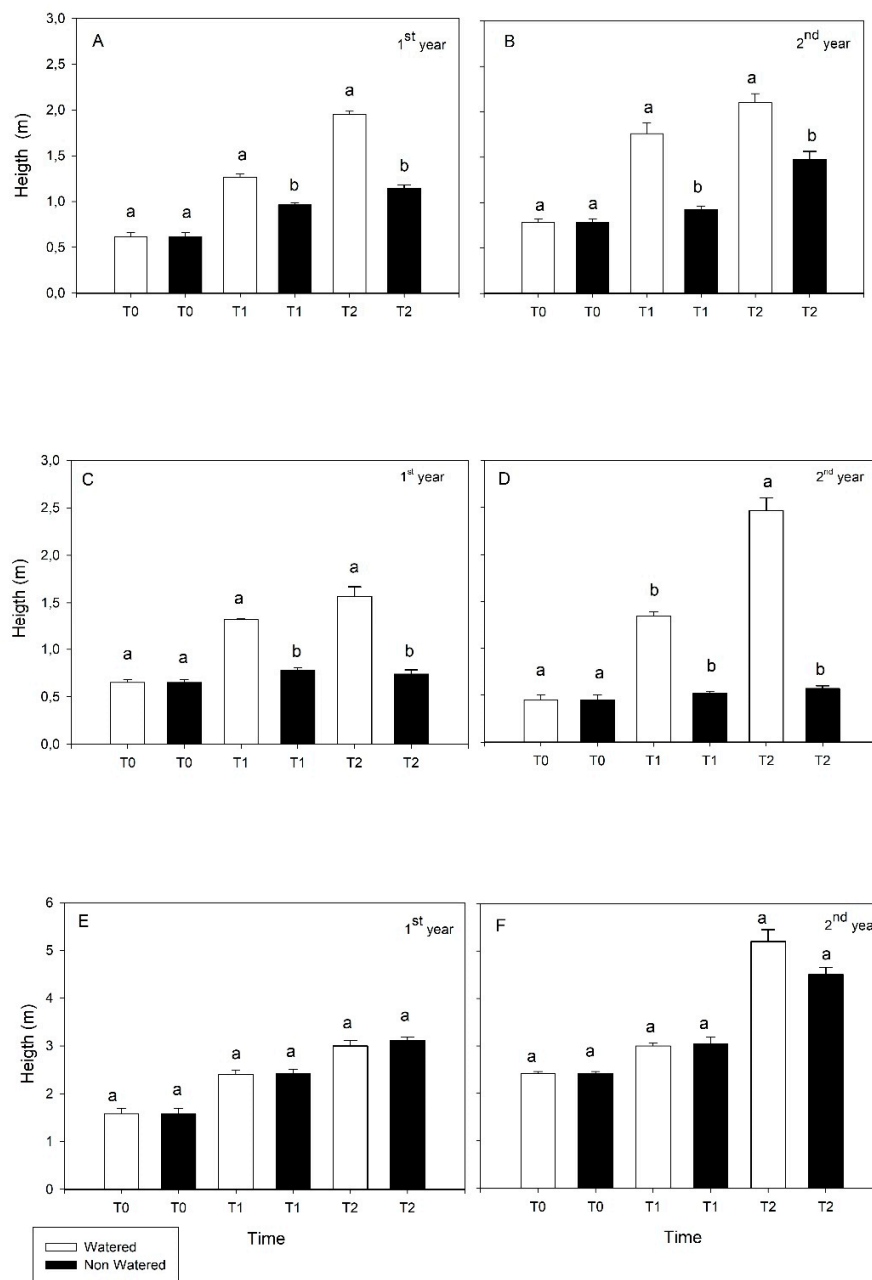

**Figure S7.** Height (m) of *Panicum virgatum* L., *Miscanthus x giganteus* and *Arundo donax* L. plants grown under irrigated (WA) and non-water (NW) conditions during the 1<sup>st</sup> (A, C, E) and 2<sup>nd</sup> year (B, D, F) at different times (T0: May, T1: June and T2: August). Values represent the mean  $\pm$  SD of nine replicates (n=9). Different lowercase letters indicate differences ( $p < 0.05$ ) between treatments for the same time.
